# Supplementary material for: An ultrasonic-assisted synthesis of leather-derived luminescent graphene quantum dots: catalytic reduction and switch on–off probe for nitro-explosives
Source: Royal Society of Chemistry journal article supplement (doi:10.1039/d0ra03715j), 2020-01-01
Supplement: d0ra03715j1.pdf [file d0ra03715j1.pdf]

**Electronic Supplementary Information**

**Ultrasonic-Assisted Synthesis of Leather-Derived Luminescent Graphene Quantum Dots:  
Catalytic Reduction and Switch on-off Probe for Nitro-Explosives**

Shamsa Kanwal<sup>a,b,c</sup>, Shanaz Jahan<sup>c</sup>, Farukh Mansoor<sup>\*a</sup>

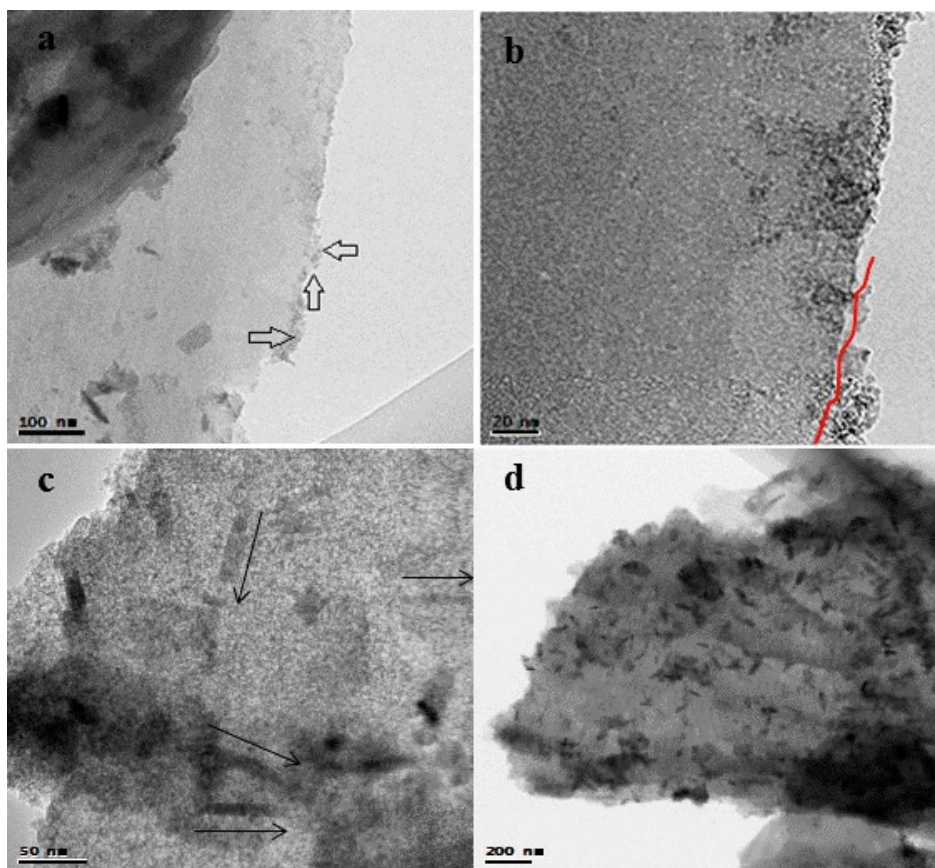

**Figure S1:** TEM images of GOS oxidative cleavage (a), shortening of GOS sheets (b), production of GONFs (c) and GOQDs (d) during the synthesis of GQDs.

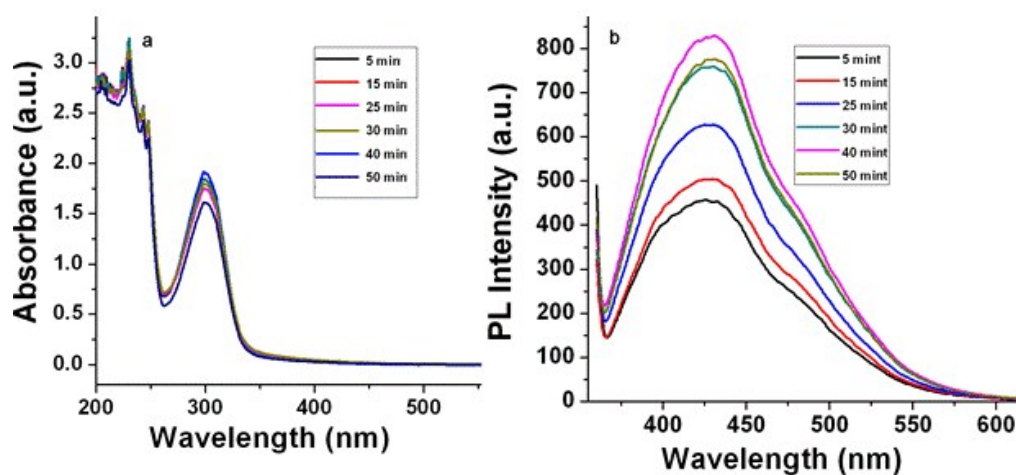

**Figure S2:** UV-visible (a) and PL spectra (b) of GQDs under nitric acid oxidation at successive ultrasonic time intervals (5-50 min).

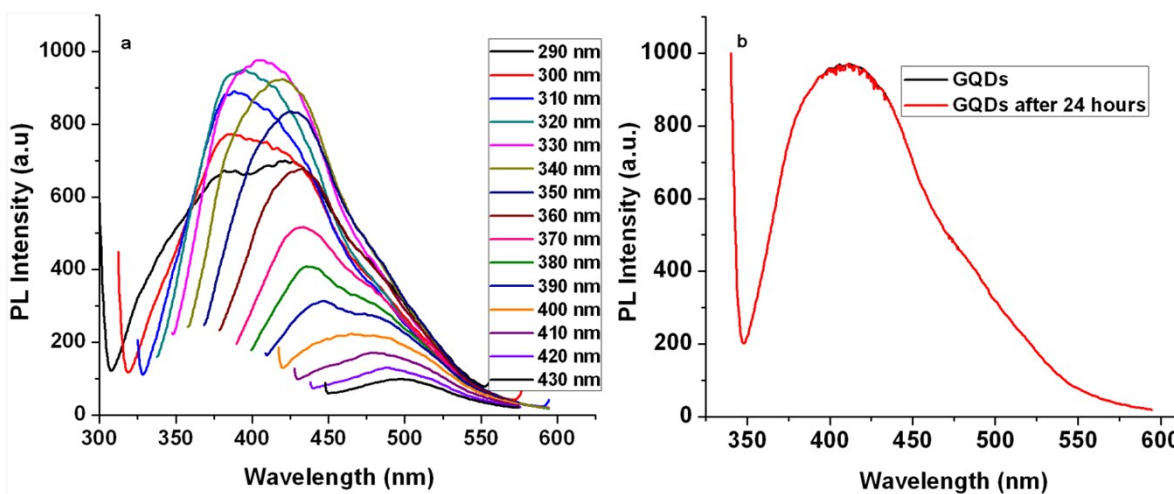

**Figure S3:** PL spectra of GQDs (70  $\mu\text{L}$  to 5 ml  $\text{H}_2\text{O}$ ) at different excitation wavelengths from 270 nm to 420 nm (a); The representative PL spectra of GQDs before and after 24 h exposure to UV-lamp at 360 nm wavelength (b).

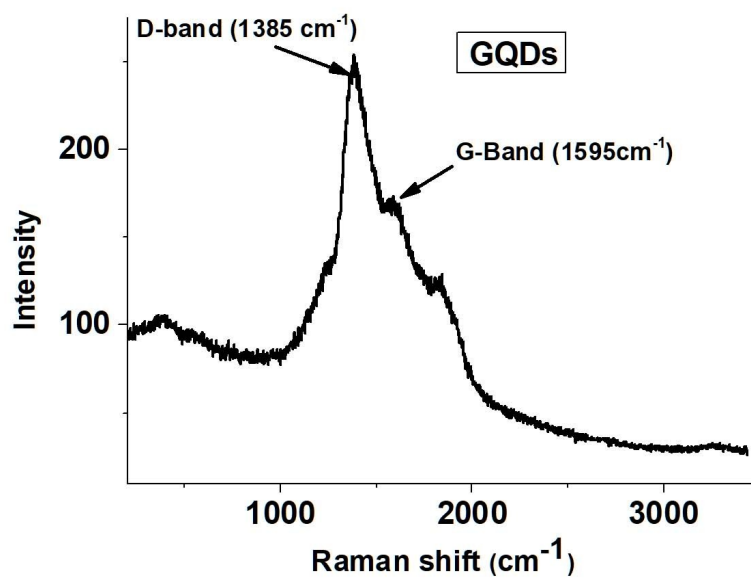

**Figure S4:** Raman spectra of GQDs

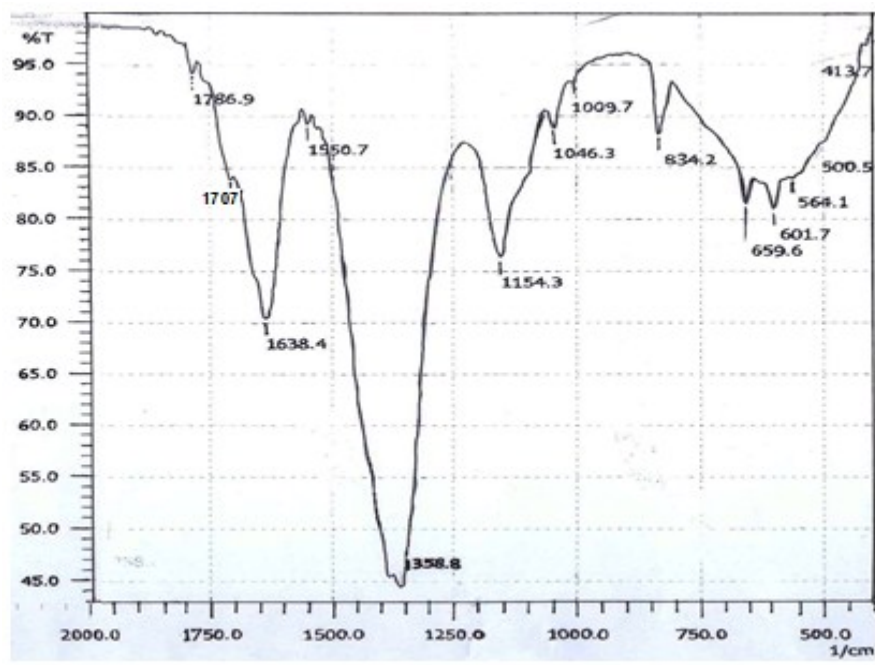

Figure S5: FTIR spectra of GQDs

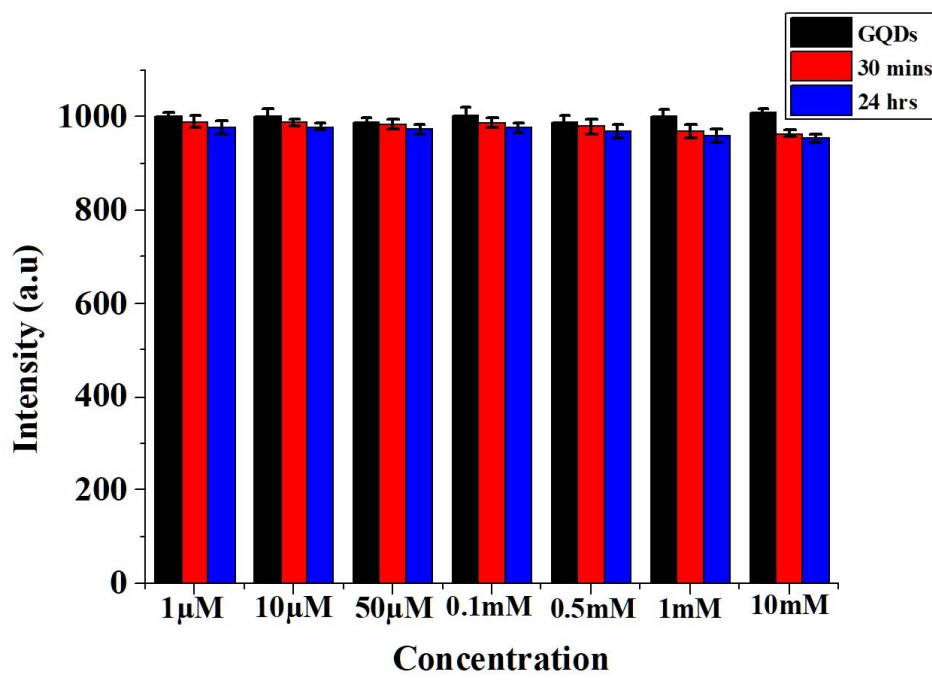

Figure S6: Effect of NaCl concentration on PL intensity of ■ GQDs ■ GQDs+NaCl after 30 mins ■ GQDs+NaCl after 24 h

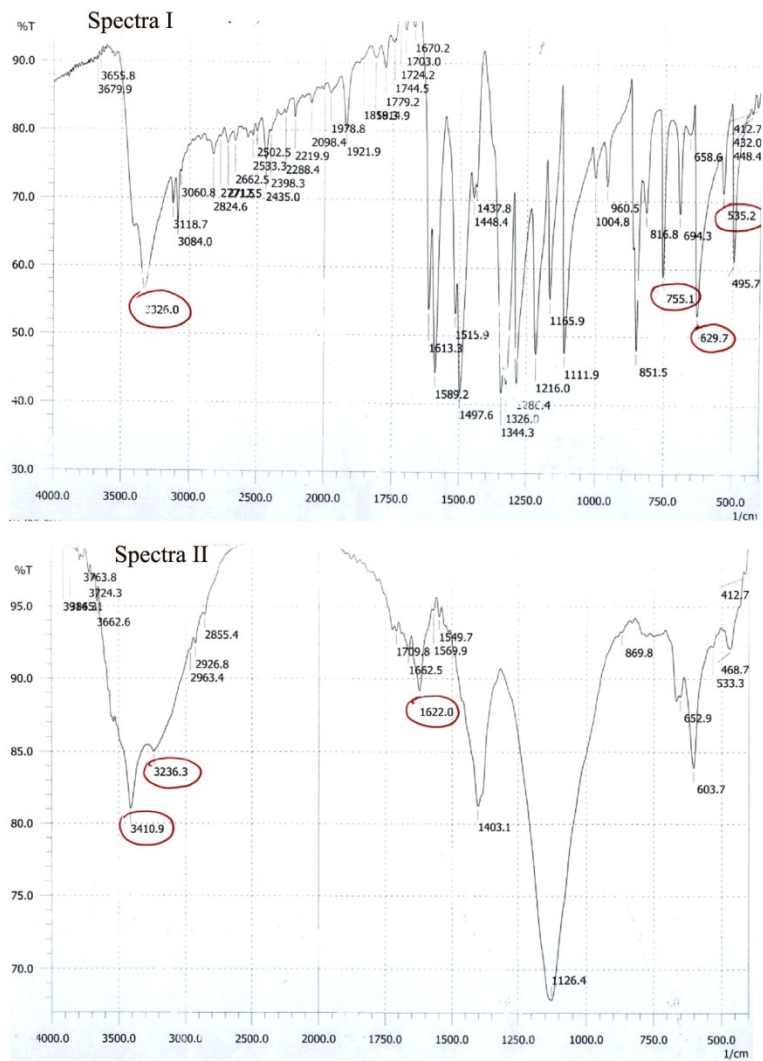

**Figure S7:** FTIR spectra I of pure PNP; and II of PNP-GQDs mixture under 360 nm UV irradiation for 2 h.

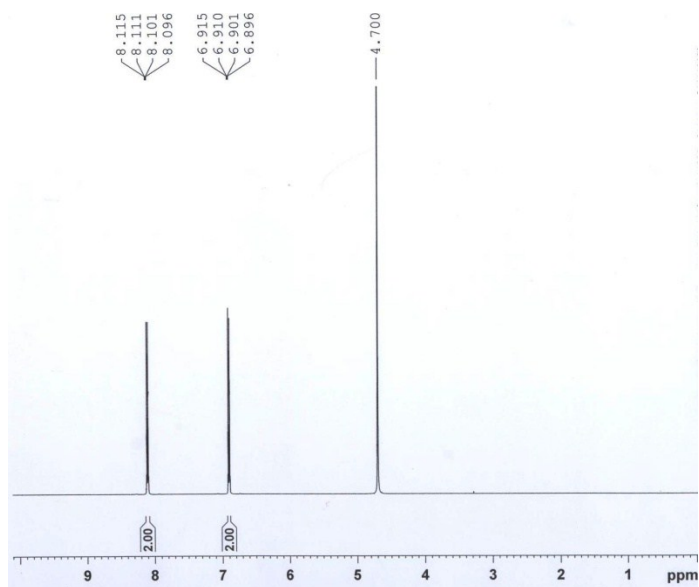

**Figure S8a:**  $^1\text{H}$ -NMR for pure PNP in  $\text{D}_2\text{O}$ .

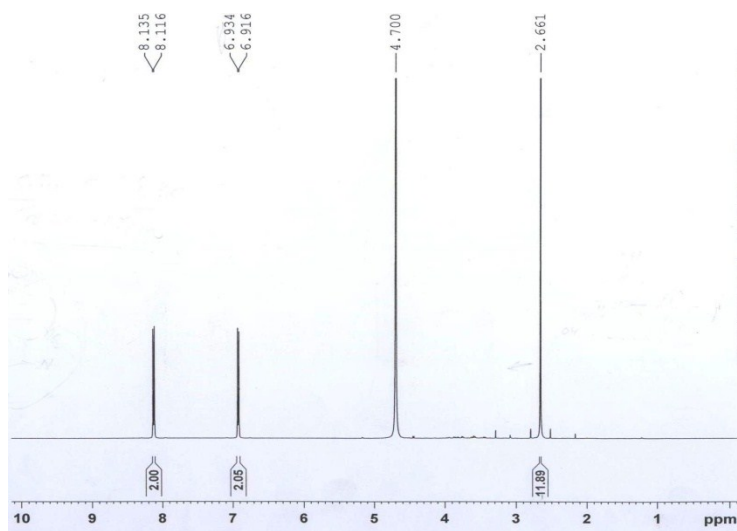

**Figure S8b:**  $^1\text{H}$ -NMR for PNP- $\text{NaBH}_4$ -GQDs in deionized water.

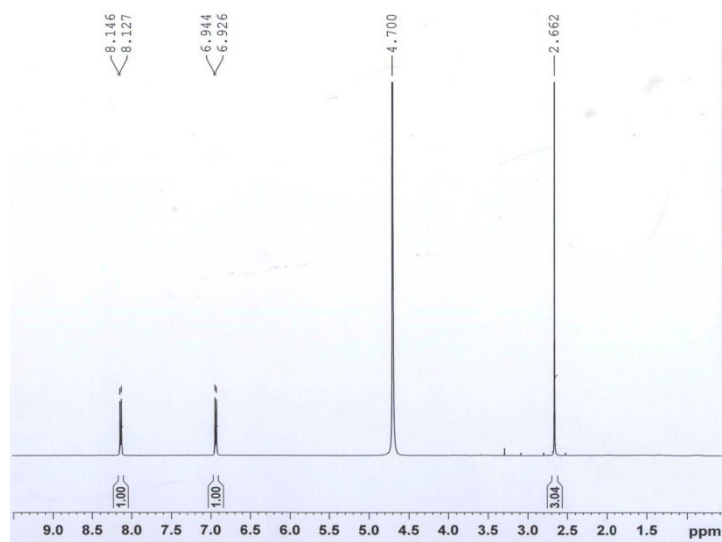

**Figure S8c:**  $H^1$ -NMR for PNP-GQDs (under UV-illumination for 2 hours) in deionized water.

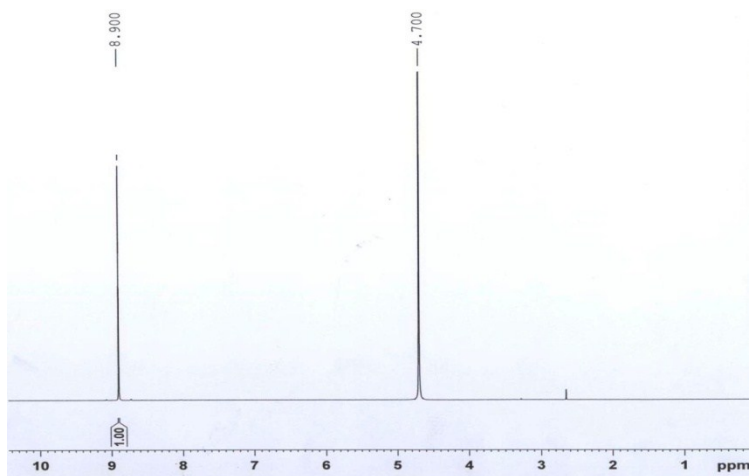

**Figure S9a:**  $H^1$ -NMR for pure TNP in deionized water.

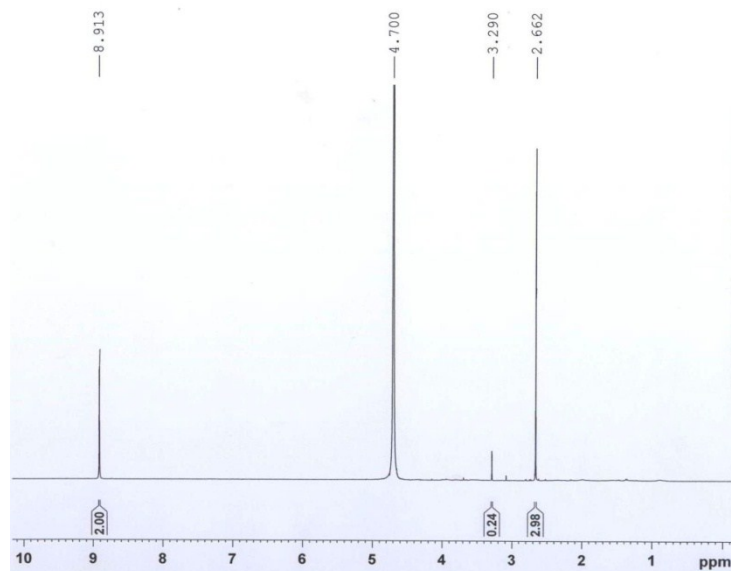

**Figure S9b:**  $^1\text{H}$ -NMR for TNP-GQDs (under UV illumination for 2 h) in deionized water.

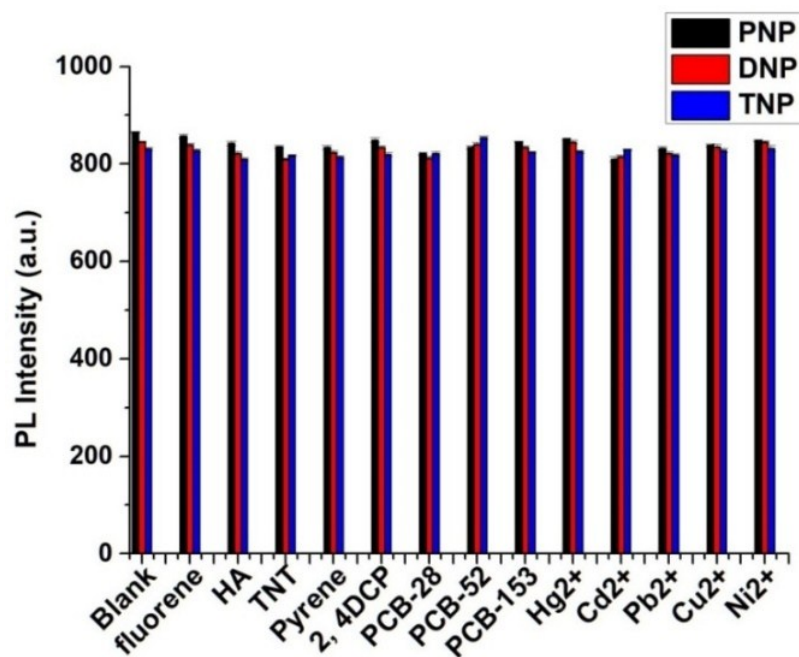

**Figure S10:** Photocatalytic reduction of PNP, DNP and TNP in the presence of interfering species. The concentration of fluorene, HA, TNT, pyrene,  $\text{Hg}^{2+}$ ,  $\text{Cd}^{2+}$  and  $\text{Pb}^{2+}$  was 10 nM and for 2, 4 DCP, PCB-28, PCB-52, PCB-153 was 50 nM. Whereas, 100 nM concentration was used for,  $\text{Cu}^{2+}$  and  $\text{Ni}^{2+}$ .



**Table S1:** Specified UV-Vis and PL peak intensities/wavelength with different carbonized source and HNO<sub>3</sub> concentration (20 min ultrasonication).

| Reaction parameters               | Amount/Concentration | Absorbance | PL       |
|-----------------------------------|----------------------|------------|----------|
|                                   | (mg or N)            | I/270 nm   | I/420 nm |
| Graphite source concentration     | 3 mg                 | 0.188      | 200      |
|                                   | 6 mg                 | 0.339      | 600      |
|                                   | 9 mg                 | 1.872      | 875      |
|                                   | 12 mg                | 0.392      | 420      |
| Concentration of HNO <sub>3</sub> | 0.25N                | 1.112      | 130      |
|                                   | 0.5N                 | 1.442      | 770      |
|                                   | 1N                   | 1.875      | 874      |
|                                   | 2N                   | 1.101      | 800      |

**Table S2:** FTIR peak assignments/intensities of few specific functional groups of graphitic products with respect to ultrasonication reaction time (RT) and their related band gaps (eV).

| FTIR peaks & Related band gap (eV)      | Peak intensity @5RT/30°C | Peak intensity @10RT/40°C | Peak intensity @15RT/50°C | Peak intensity @20RT/60°C | Peak intensity @25RT/70°C | Peak intensity @40RT/90°C |
|-----------------------------------------|--------------------------|---------------------------|---------------------------|---------------------------|---------------------------|---------------------------|
| Carbonyl (C=O) at 1709 cm <sup>-1</sup> | -                        | 89%T                      | 88%T                      | 86%T                      | 84%T                      | -                         |
| Epoxy (C-O-C) at 1042 cm <sup>-1</sup>  | 98%T                     | 94%T                      | 92%T                      | 91%T                      | 89%T                      | -                         |
| Related band gap (eV)                   | 0.82 eV                  | 0.87 eV                   | 0.90 eV                   | 0.96 eV                   | 1.00 eV                   | 1.04 eV                   |

**Table S3:** FTIR peak characterization of some assigned groups before and after addition of 5 nM catalyst GQDs into 2 mL of 1  $\mu$ M PNP.

| S. No. | FTIR Assigned Peaks                                       | Spectral Data I | Spectral Data II |
|--------|-----------------------------------------------------------|-----------------|------------------|
| 1.     | PNP                                                       |                 |                  |
|        | NO <sub>2</sub> rocking vibration at 535 cm <sup>-1</sup> | ✓               | -                |
|        | NO <sub>2</sub> scissoring at 629 cm <sup>-1</sup>        | ✓               | -                |
|        | NO <sub>2</sub> wagging at 755 cm <sup>-1</sup>           | ✓               | -                |
| 2.     | PNP+GQDs                                                  |                 |                  |
|        | Symmetric N-H stretch at 3236 cm <sup>-1</sup>            | -               | ✓                |
|        | Asymmetric N-H stretch at 3410 cm <sup>-1</sup>           | -               | ✓                |
|        | N-H bending vibration at 1662cm <sup>-1</sup>             | -               | ✓                |

**Table S4:** Linear ranges, LODs and regression equations for detection of nitrophenols on PL quenching of GQDs.

| Type of nitrophenols | Linear detectable Concentration range | LOD   | Regression equation, coefficient (R <sup>2</sup> ) |
|----------------------|---------------------------------------|-------|----------------------------------------------------|
| <b>PNP</b>           | 10-550 nM                             | 10 pM | I= 914.97+(-1.038) C, 0.995                        |
| <b>DNP</b>           | 20-310 nM                             | 65 pM | I= 975.30+(-1.9502) C, 0.995                       |
| <b>TNP</b>           | 10-500 nM                             | 80 pM | I= 943.03+(-1.261) C, 0.996                        |

**Table S5:** Determination of PNP and TNP in industrial water and in soil samples, respectively.

| <b>Samples</b>     | <b>Nitrophenols detected<br/>nM, RSD, n=3</b> | <b>Samples Spiked<sup>a</sup><br/>nM</b> | <b>Nitrophenols measured<br/>nM, RSD, n=3</b> | <b>Recoveries</b> |
|--------------------|-----------------------------------------------|------------------------------------------|-----------------------------------------------|-------------------|
| Soil Sample 1      | 320.3±1.1 TNP                                 | 400 TNP                                  | 359.6±1.4 TNP                                 | 99.73%            |
| Soil Sample 2      | 47.3± 2.3 TNP                                 | 52 TNP                                   | 49.3±2.1 TNP                                  | 98.6%             |
| Industrial Water 1 | 90.3±1.7 PNP                                  | 100 PNP                                  | 95.4±1.9 PNP                                  | 101.3%            |
| Industrial Water 2 | 120±2.1 PNP                                   | 135 PNP                                  | 127.4±3.1 PNP                                 | 99.7%             |

<sup>a</sup>1 mL of spiked solution was added to 1 mL of sample volume.
